# Supplementary material for: Eosinophils may play regionally disparate roles in influencing IgA+ plasma cell numbers during large and small intestinal inflammation
Source: Springer Nature journal article supplement (doi:10.1186/s12865-016-0153-0), 2016-05-31

Small Intestine

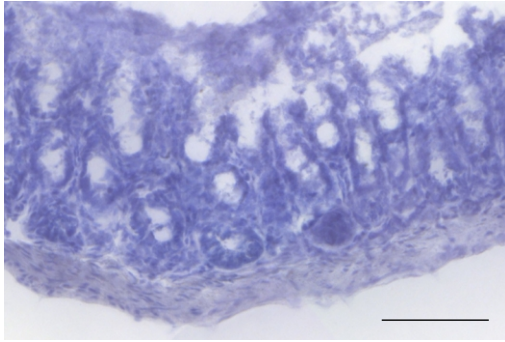

IgA  
isotype  
control

Colon

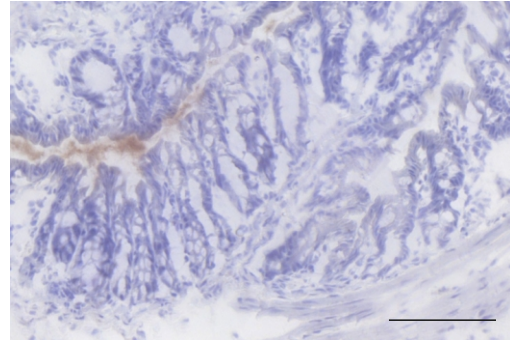

Siglec F  
isotype  
control

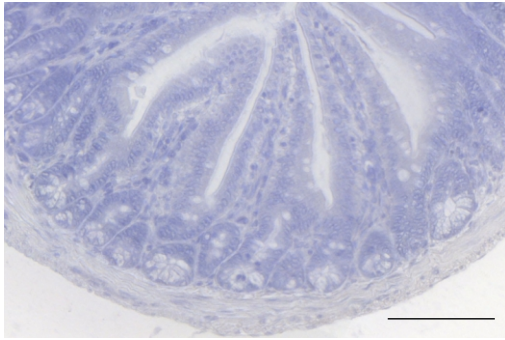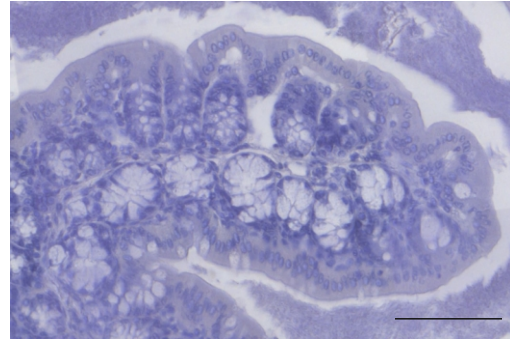

MAdCAM-1  
isotype  
control

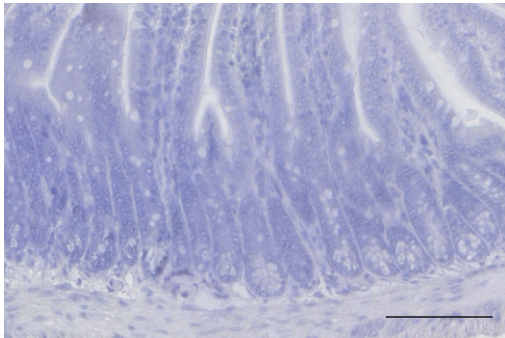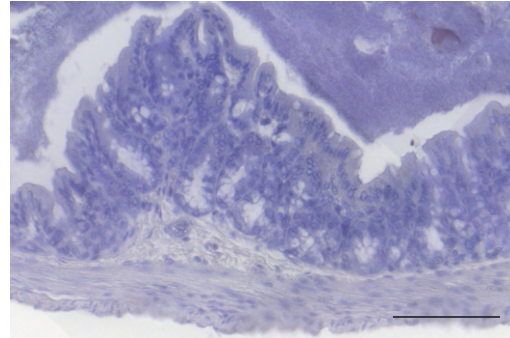

Supplement: MOESM1 [file 10243514]
